# Supplementary material for: Bismuth-based mixed-anion compounds for anode materials in rechargeable batteries
Source: Royal Society of Chemistry journal article supplement (doi:10.1039/d1cc06456h), 2022-01-01
Supplement: d1cc06456h1.pdf [file d1cc06456h1.pdf]

## Essential Supporting Information

### Bismuth-based mixed-anion compounds for anode materials in rechargeable batteries

Prashant Kumar,<sup>a</sup> Wandi Wahyudi,<sup>a</sup> Abhinav Sharma,<sup>a</sup> Youyou Yuan,<sup>b</sup> George T. Harrison,<sup>a</sup> Murali Gedda,<sup>a</sup> Xuan Wei,<sup>a</sup> Abdulrahman El-Labban,<sup>a</sup> Shahzad Ahmad,<sup>c</sup> Vinod Kumar,<sup>d</sup> Vincent Tung,<sup>a</sup> Thomas D. Anthopoulos<sup>\*a</sup>

<sup>a</sup>KAUST Solar Center, King Abdullah University of Science and Technology (KAUST), Thuwal 23955-6900, Saudi Arabia.

<sup>b</sup>Core Labs, King Abdullah University of Science and Technology (KAUST), Thuwal 23955-6900, Saudi Arabia.

<sup>c</sup>Department of Chemistry, Zakir Husain Delhi College, University of Delhi, Delhi 110002, India.

<sup>d</sup>Special Center for Nanoscience, Jawaharlal Nehru University, Delhi 110067, India.

#### Corresponding Author

\*Email: [thomas.anthopoulos@kaust.edu.sa](mailto:thomas.anthopoulos@kaust.edu.sa)

#### Experimental section

##### *Materials and methods*

We used bismuth triiodide as molecular precursor for bismuth and iodine, while thiourea was used as sulfur source. Excess of sulfur was used for Bi<sub>13</sub>S<sub>18</sub>I<sub>2</sub> while for BiSI, equimolar concentration of Bi and S were used.

For the synthesis of Bi<sub>13</sub>S<sub>18</sub>I<sub>2</sub>, 304.48 mg (4 mmol) of thiourea ((NH<sub>2</sub>CSNH<sub>2</sub>, 99%, Sigma Aldrich)) was mixed well with 589.6 mg (10 mmol) of bismuth triiodide (BiI<sub>3</sub>, 99.999% metal basis, Alfa Aesar) in 60 ml ethanol in an 82 ml autoclave at 60 °C for 7 hours under continuous stirring and then, this autoclave was heated at 120 °C for 24 hours in a thermal oven (Thermoscientific, Heratherm). After the reaction, black color solution was separated by centrifuge at 2000 rpm in Eppendorf centrifuge 5702R and then washed multiple times with ethanol and isopropyl alcohol (IPA) repeatedly. The separated sample was dried at 60 °C for 1 hour and used for further characterization and application. For the synthesis of BiSI, 76.12 mg (1

mmol) of thiourea (( $\text{NH}_2\text{CSNH}_2$ , 99%, Sigma Aldrich)) was mixed well with 589.6 mg (10 mmol) of bismuth triiodide ( $\text{BiI}_3$ , 99.999% metal basis, Alfa Aesar) reacted under similar conditions as mentioned above. The electrochemical performances of the materials were evaluated with 2032-type half-cells lithium battery system. To prepare the electrode, the synthesized materials were dispersed in dimethylformamide (DMF), and then drop cast onto 13 mm diameter carbon clothes, followed by drying at 60 °C in vacuum. The use of carbon cloth instead of the conventional copper current collector was aimed to provide a better electronic conductivity because we didn't mix the materials with other carbon. Lithium metal was used as the counter electrode, the electrolyte was the commercial 1.0 M  $\text{LiPF}_6$  ethylene carbonate-dimethyl carbonate solution, and the separator was glass fiber filter paper. The open-circuit voltage (OCV), cyclic voltammetry (CV), and electrochemical impedance spectroscopy (EIS) analysis were carried out using VMP3 potentiostat (Bio-Logic). CV measurement was performed at a potential sweep of 0.01- 3.0 V with a constant scan rate of 0.2 mV s<sup>-1</sup>. EIS measurement was performed with a frequency range between 100.0 KHz and 10.0 mHz. Cycle performance of the cells were evaluated using a multichannel battery cycler (Neware) at a potential window of 0.01 - 3.0 V and a current density of 100 mA g<sup>-1</sup>. The specific capacity of the cells was calculated based on the mass of active materials of the anode (1 mg cm<sup>-2</sup>). The cells were assembled in the argon-filled glovebox. XRD analysis of the electrodes was performed after the first discharge and charge cycle, the samples were prepared in the glovebox.

### *Characterization*

The morphologies of the as-prepared membrane was examined by field emission scanning electron microscope (FEI Quanta 200). Elemental distribution and quantitative analysis was carried out using Energy dispersive X-ray spectroscopy (EDS) combined with SEM. Phase purity and identification of the synthesized compounds were carried out using powder X-ray diffraction (Bruker D8 Advance) with Cu  $K_\alpha$  radiation ( $\lambda = 1.5406$  nm), step size 0.02° 2 $\theta$ , and scan speed 1° min<sup>-1</sup>. Absorbance of the synthesized powder compounds were recorded on Perkin Elmer Lambda 950 instrument in reflectance mode. Thermogravimetric analysis (TGA) was carried out using thermal analyzer Discovery TGA under N<sub>2</sub> atmosphere with a heating rate of 10 °C min<sup>-1</sup>. All the crystallographic projections were regenerated using Diamond 4.0. Rietveld refinement was carried out using Topas-5 academic program, while Le Bail fitting was carried out using GSAS-II program.

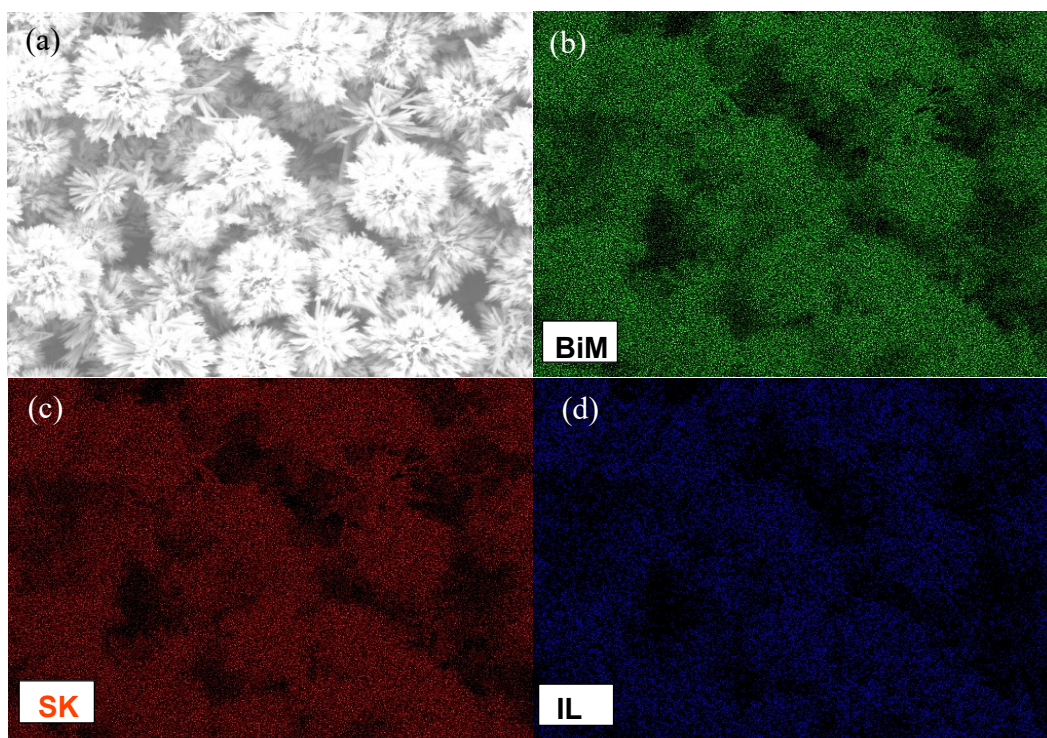

**Fig. S1.** (a) SEM image of the synthesized  $\text{Bi}_{13}\text{S}_{18}\text{I}_2$  and corresponding elemental mapping for (b) Bi-M line (c) S-K line and (d) I-L line

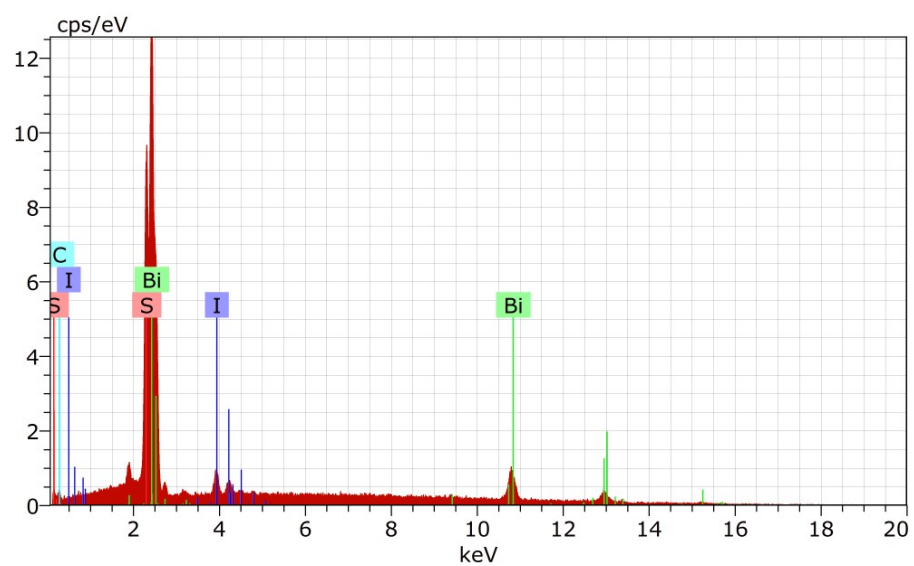

**Fig. S2.** EDS spectrum for synthesized  $\text{Bi}_{13}\text{S}_{18}\text{I}_2$

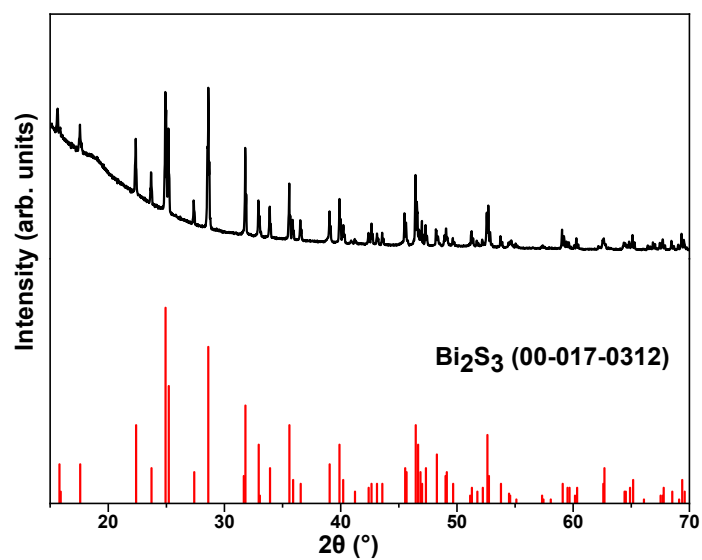

**Fig. S3.** Powder X-ray diffraction pattern of  $\text{Bi}_2\text{S}_3$  obtained after the thermal dissociation of  $\text{Bi}_{13}\text{S}_{18}\text{I}_2$  at 600 °C.

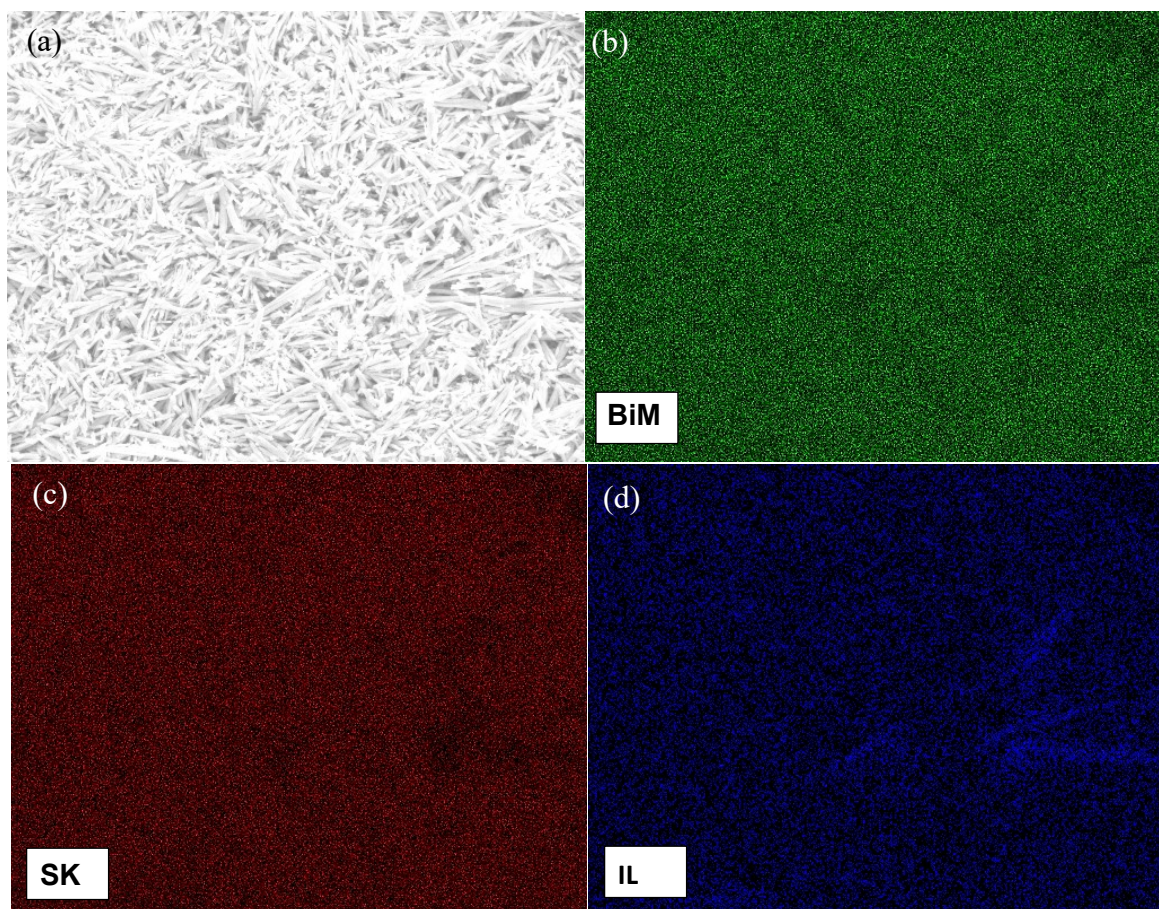

**Fig. S4.** (a) SEM image of the synthesized BiSI and corresponding elemental mapping for (b) Bi-M line (c) S-K line and (d) I-L line.

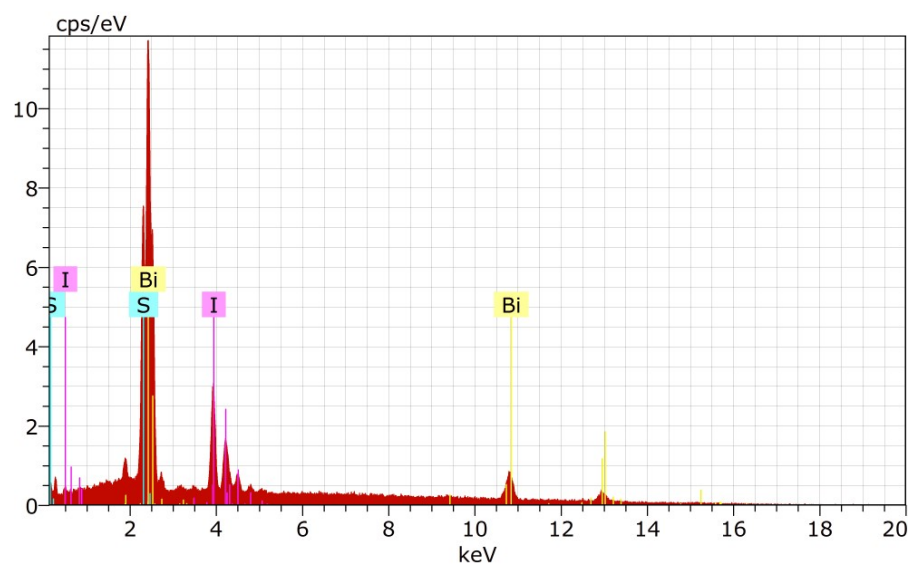

**Fig. S5.** EDS spectrum for synthesized BiSI.

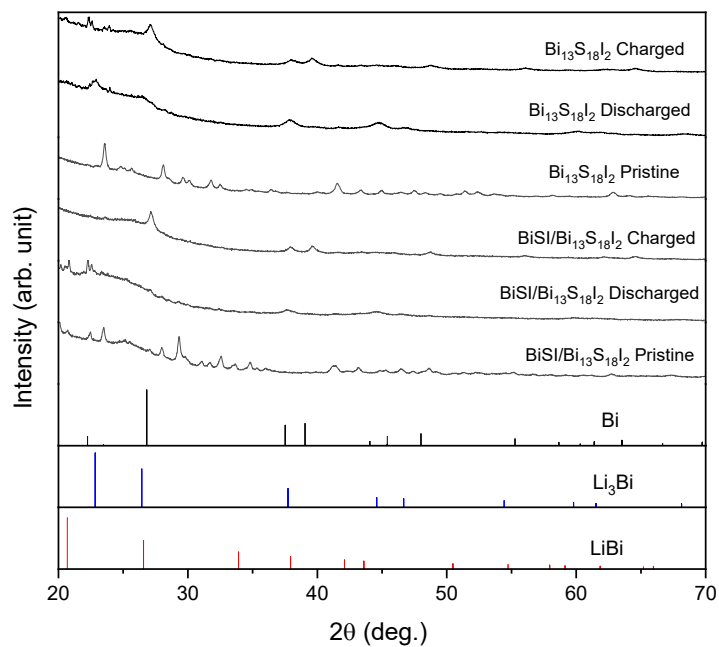

**Fig. S6.** Ex-situ XRD patterns of  $\text{Bi}_{13}\text{S}_{18}\text{I}_2$ , and  $\text{BiSI}/\text{Bi}_{13}\text{S}_{18}\text{I}_2$  electrodes after the first discharge and charge processes. Planes corresponding to  $\text{LiBi}$ ,  $\text{Li}_3\text{Bi}$  and  $\text{Bi}$  are shown by red, blue and black colors vertical lines.

**Table S1.** Comparison of bismuth-based electrode performances in lithium (LIB), sodium (SIB), and potassium (PIB) battery systems.

| Reference                                                                               | Materials                                               | 1 <sup>st</sup> Cycle (mAh g <sup>-1</sup> )                    | 15 <sup>th</sup> Cycle (mAh g <sup>-1</sup> ) | Battery System |
|-----------------------------------------------------------------------------------------|---------------------------------------------------------|-----------------------------------------------------------------|-----------------------------------------------|----------------|
| This work                                                                               | BiSI<br>Bi <sub>13</sub> S <sub>18</sub> I <sub>2</sub> | 1087 at 100 mA g <sup>-1</sup><br>807 at 100 mA g <sup>-1</sup> | 800<br>630                                    | LIB            |
| Ref. <sup>1</sup><br><i>ACS Appl. Mater. Interfaces</i> , 2020, <b>12</b> , 42902-42910 | Bi <sub>2</sub> S <sub>3</sub> /MoS <sub>2</sub>        | 500 at 500 mA g <sup>-1</sup>                                   | 500                                           | SIB            |
|                                                                                         |                                                         | 410 at 1 A g <sup>-1</sup>                                      | 380                                           | PIB            |
| Ref. <sup>2</sup><br><i>Dalton Trans.</i> , 2019, <b>48</b> , 10448-10454               | BiSbS <sub>3</sub> -Carbon                              | 900 at 100 mA g <sup>-1</sup>                                   | ~700                                          | SIB            |
| Ref. <sup>3</sup><br><i>ACS Nano</i> , 2018, <b>12</b> , 12597-12611                    | Bi <sub>2</sub> S <sub>3</sub> yolk shell               | 800 at 100 mA g <sup>-1</sup>                                   | 600                                           | LIB            |
| Ref. <sup>4</sup><br><i>Nano Res.</i> , 2018, <b>11</b> , 4614-4626                     | Bi <sub>2</sub> S <sub>3</sub> -graphene                | 600 at 312.5 mA g <sup>-1</sup>                                 | 400                                           | SIB            |
| Ref. <sup>5</sup><br><i>Nano Energy</i> , 2017, <b>33</b> , 213-220                     | Bi <sub>2</sub> S <sub>3</sub> yolk shell               | 580 at 312.5 mA g <sup>-1</sup>                                 | 550                                           | LIB            |
|                                                                                         |                                                         | 500 at 312.5 mA g <sup>-1</sup>                                 | 470                                           | SIB            |
| Ref. <sup>6</sup><br><i>J. Power Sources</i> , 2016, <b>309</b> , 135-140               | Bi <sub>2</sub> S <sub>3</sub> nanorod                  | 620 at 100 mA g <sup>-1</sup>                                   | 500                                           | SIB            |
| Ref. <sup>7</sup><br><i>Chem. Commun.</i> , 2015, <b>51</b> , 2798-2801                 | BiOI                                                    | 700 at 30 mA g <sup>-1</sup>                                    | -                                             | LIB            |
| Ref. <sup>8</sup><br><i>J. Mater. Chem. A</i> , 2014, <b>2</b> , 13854-13858            | Bi <sub>2</sub> S <sub>3</sub> -CNT                     | 700 at 100 mA g <sup>-1</sup>                                   | ~680                                          | LIB            |
| Ref. <sup>9</sup><br><i>Adv. Energy Mater.</i> , 2014, <b>4</b> , 1400798               | Bi <sub>2</sub> S <sub>3</sub> -CNT                     | 510 at 200 mA g <sup>-1</sup>                                   | 490                                           | LIB            |
| Ref. <sup>10</sup><br><i>J. Alloys Compd.</i> , 2013, <b>579</b> , 18-26                | BiPO <sub>4</sub>                                       | 250 at 26.45 mA g <sup>-1</sup>                                 | 100                                           | LIB            |

## Supporting References

1. Y. Qin, Y. Zhang, J. Wang, J. Zhang, Y. Zhai, H. Wang and D. Li, *ACS Appl. Mater. Interfaces*, 2020, **12**, 42902-42910.
2. S. Wen, J. Zhao, J. Chen, J. Yang and J. Xu, *Dalton Trans.*, 2019, **48**, 10448-10454.
3. L. Zhao, H.-H. Wu, C. Yang, Q. Zhang, G. Zhong, Z. Zheng, H. Chen, J. Wang, K. He, B. Wang, T. Zhu, X. C. Zeng, M. Liu and M.-S. Wang, *ACS Nano*, 2018, **12**, 12597-12611.
4. C. Lu, Z. Li, L. Yu, L. Zhang, Z. Xia, T. Jiang, W. Yin, S. Dou, Z. Liu and J. Sun, *Nano Res.*, 2018, **11**, 4614-4626.
5. H. Liang, J. Ni and L. Li, *Nano Energy*, 2017, **33**, 213-220.
6. W. Sun, X. Rui, D. Zhang, Y. Jiang, Z. Sun, H. Liu and S. Dou, *J. Power Sources*, 2016, **309**, 135-140.
7. C. Chen, P. Hu, X. Hu, Y. Mei and Y. Huang, *Chem. Commun.*, 2015, **51**, 2798-2801.
8. Y. Zhao, T. Liu, H. Xia, L. Zhang, J. Jiang, M. Shen, J. Ni and L. Gao, *J. Mater. Chem. A*, 2014, **2**, 13854-13858.
9. J. Ni, Y. Zhao, T. Liu, H. Zheng, L. Gao, C. Yan and L. Li, *Adv. Energy Mater.*, 2014, **4**, 1400798.
10. B. Hu, X. Wang, Q. Wei, H. Shu, X. Yang, Y. Bai, H. Wu, Y. Song and L. Liu, *J. Alloys Compd.*, 2013, **579**, 18-26.
